# Supplementary material for: An interband cascade laser based heterodyne detector with integrated optical amplifier and local oscillator
Source: publisher site journal article supplement (doi:10.1515/nanoph-2023-0762), 2024-02-05
Supplement: Supplementary file [file j_nanoph-2023-0762_suppl_002.pdf]

# Supplementary Information: An interband cascade laser based heterodyne detector with integrated optical amplifier and local oscillator

Sandro Dal Cin,<sup>\*</sup> Andreas Windischhofer, Florian Pilat, Michael Leskowschek,  
Vito F. Pecile, Mauro David, Maximilian Beiser, Robert Weih, Johannes Koeth,  
Georg Marschick, Borislav Hinkov, Gottfried Strasser, Oliver H. Heckl, and Benedikt Schwarz<sup>†</sup>

---

<sup>\*</sup> sandro.cin@tuwien.ac.at

<sup>†</sup> benedikt.schwarz@tuwien.ac.at

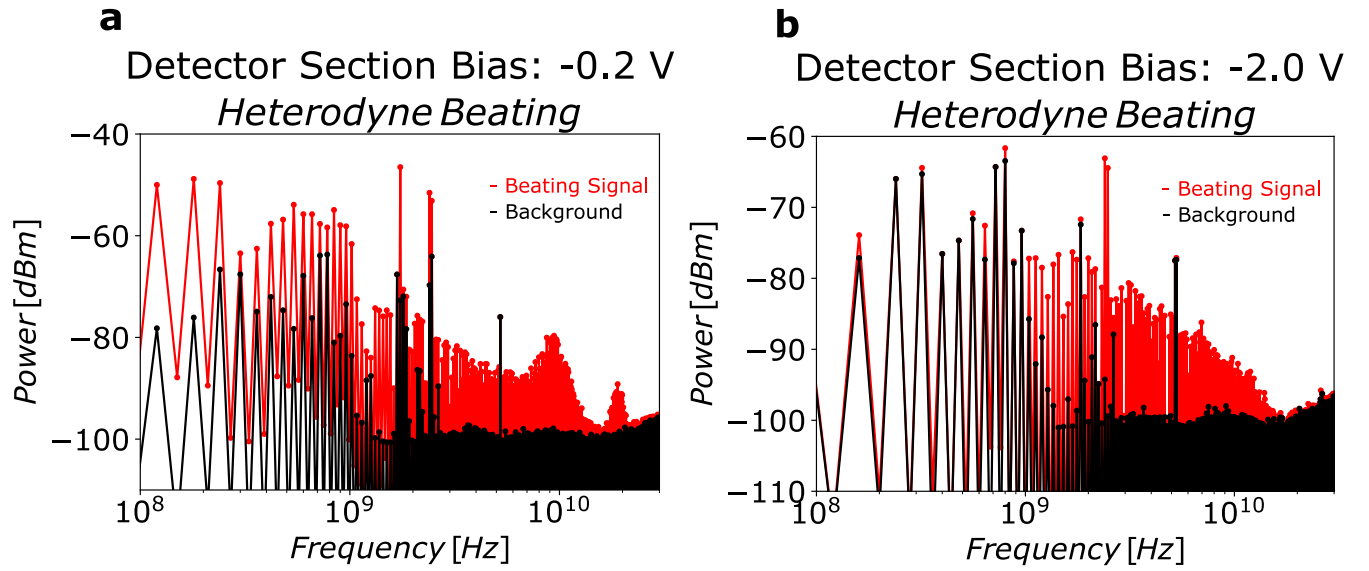

FIG. 1. **Supplemental Figure 1:** (a) Heterodyne beating between the externally injected single-mode laser and the on-chip racetrack signal recorded up to a frequency of 30GHz on a spectrum analyzer. The black trace represents the background signal and the red trace the beating signal. The bias of the detector section was set to -0.2V. The beating signal is well established above the noise floor up to a frequency of 20GHz. (b) Heterodyne Beating recorded for a detector section bias of -2.0V. For increasing negative bias, the beating signal is only pronounced above background noise levels up to a frequency of 15GHz. Both results were obtained by using the spectrum analyzer Max-Hold setting and tuning the temperature of the single-mode laser in order to sweep the resulting beating signal position.
