# Supplementary figures and images for: An interband cascade laser based heterodyne detector with integrated optical amplifier and local oscillator
Source: publisher site journal article supplement (doi:10.1515/nanoph-2023-0762), 2024-02-05

**a**

Detector Section Bias: -0.2 V  
*Heterodyne Beating*

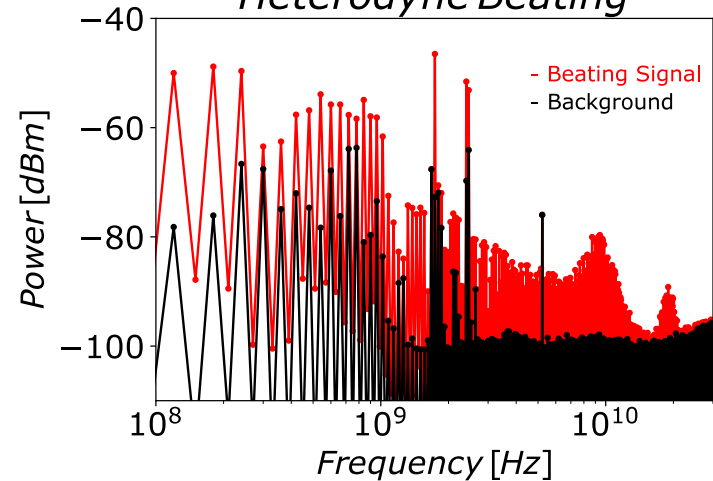**b**

Detector Section Bias: -2.0 V  
*Heterodyne Beating*

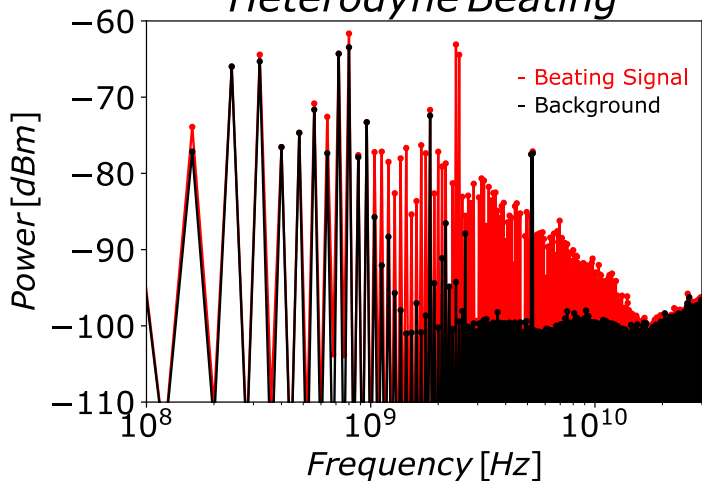

Supplement: Supplementary file 1 [file fig_1_supp.pdf › fig_1_supp.pdf]
